# Supplementary material for: Biological characterization of surface-treated dental implant materials in contact with mammalian host and bacterial cells: titanium versus zirconia
Source: PubMed Central journal article supplement — RSC Adv. 2019 Oct 9;9(55):32097–109. doi: 10.1039/c9ra06010c (PMC9072875; doi:10.1039/c9ra06010c), 2019-10-09
Supplement: RA-009-C9RA06010C-s001.pdf [file RA-009-C9RA06010C-s001.pdf]

## Biological Characterization of Surface-treated Dental Implant Materials in Contact with Mammalian Host and Bacterial Cells: Titanium versus Zirconia

Danyal A. Siddiqui<sup>a</sup>, Joel J. Jacob<sup>b</sup>, Alikhan Fidai<sup>a</sup>, Danieli C. Rodrigues<sup>a\*</sup>

<sup>a</sup> Department of Bioengineering, The University of Texas at Dallas, 800 W. Campbell Road, Richardson, TX, USA 75080

<sup>b</sup> Department of Biological Sciences, The University of Texas at Dallas, 800 W. Campbell Road, Richardson, TX, USA 75080

\*Corresponding Author: danieli@utdallas.edu

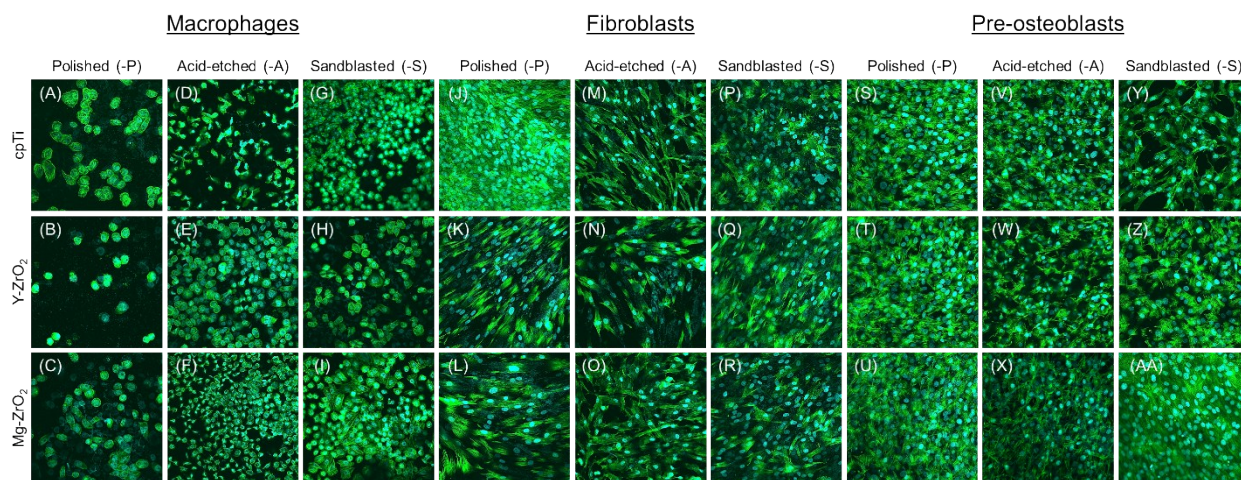

Figure S1. Confocal images of human macrophages, human gingival fibroblasts (HGF-1), and murine pre-osteoblasts (MC3T3-E1) on polished (-P), acid-etched (-A), and sandblasted (-S) cpTi, Y-ZrO<sub>2</sub>, and Mg-ZrO<sub>2</sub> after 3 days of growth.

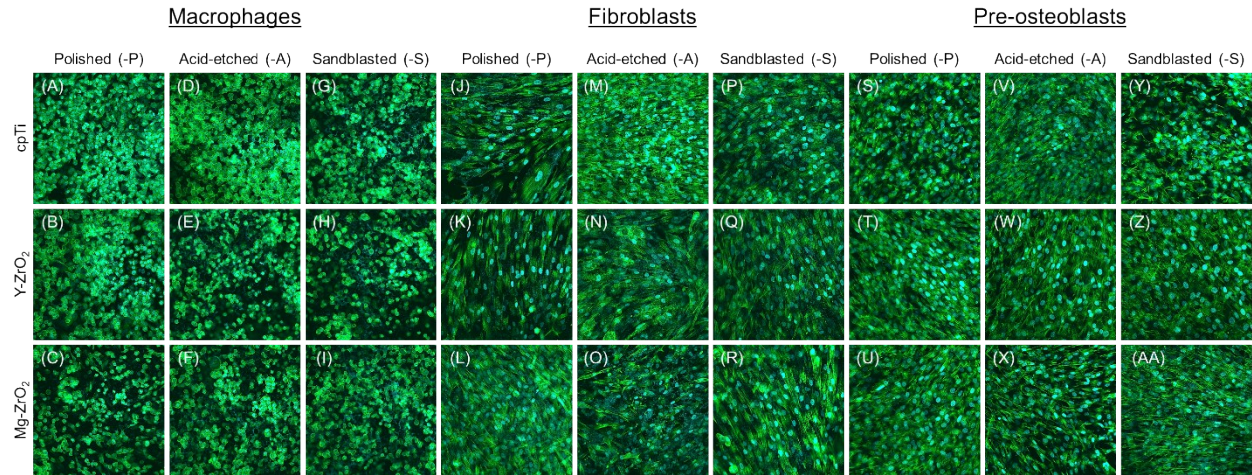

Figure S2. Confocal images of human macrophages, human gingival fibroblasts (HGF-1), and murine pre-osteoblasts (MC3T3-E1) on polished (-P), acid-etched (-A), and sandblasted (-S) cpTi, Y-ZrO<sub>2</sub>, and Mg-ZrO<sub>2</sub> after 7 days of growth.
